# Supplementary material for: Social Listening – Revealing Parkinson’s Disease over Day and Night
Source: Research Square preprint supplement (doi:10.21203/rs.3.rs-55799/v4), 2020-11-16
Supplement: Supplementary file 1 [file f02b4333af89b1245dfef9ce.xlsx]

## Sheet: overall symptoms
Primary classification	Secondary classification	Key words	Key words_Synonyms
Motor symptoms	Tremor	抖/颤	地抖/抖/斗动/哆嗦/发抖/会抖/身抖/手抖/微抖/摇摆/摇晃/战抖/战栗/震抖/颤抖/静止性振颤/颤动/颤栗/发颤/静颤/轻颤/手颤/微颤/阵颤/振颤/震颤/抖颤
Motor symptoms	Rigidity	僵直	僵硬/僵化/僵麻/僵痛/缰硬/疆硬/肢体僵硬/疆直/僵/僵尸/僵住/晨僵/晨起僵硬/起床僵/关节强直/肌强直/肌张力增高/姿势反射/肌张力失调/肢肌肉萎缩/肌张力障碍
Motor symptoms	Rigidity	翻身难	晚上翻身/夜间翻身/起床/起身/起卧/
Motor symptoms	Bradykinesia	表情减少僵硬或面具脸	呆板/面部僵/流口水/面部表情/木纳/木讷/死板/无表情/无神/眼发直/眼无神/脸僵/表情僵/表情减少/表情少/面具脸/面瘫
Motor symptoms	Bradykinesia	行走困难/动作慢	搀扶/行动不便/行动迟缓/行走不便/缓慢行走/卧病在床/肢肌肉萎缩/拄杖/走路不稳/迈不动步/挪不动/人架/站不起来/不能移动/关节强直/肌强直/肌张力增高/姿势反射/肌张力失调/肢肌肉萎缩/肌张力障碍
Motor symptoms	Bradykinesia	吐字不清	大舌头/含糊/含糊不清/含混/含混不清/口齿不清/咬字/语言不清/口吃
Motor symptoms	Bradykinesia	小字症	no synobyms
Motor symptoms	Bradykinesia	言语障碍	慌张言语/语速变慢/语调变低/发声困难/发音困难/构音困难/语言障碍/语速/语调/发声/发音/构音
Motor symptoms	Postural Instability	步态失衡	走路前冲/慌张步态/前冲步态/冻结/前趋/平衡
Motor symptoms	Postural Instability	跌倒	绊倒/倒地/跌/跌倒/跌跌撞撞/跌跤/踉跄/倾倒/摔/摔到/摔跟斗/摔跟头/摔过/摔跤/摔了一跤/摔破/摔倒
Non-motor symptoms	Sleep and Sensory Disorders	打鼾	喘鸣/打呼/打呼噜/鼾声
Non-motor symptoms	Sleep and Sensory Disorders	睡眠浅	警醒/老醒/弄醒/睡不实/总醒/夜惊/易醒/惊醒
Non-motor symptoms	Sleep and Sensory Disorders	睡眠质量差	睡不/睡不好/睡眠差/睡觉不好/睡眠不足/睡眠质量
Non-motor symptoms	Sleep and Sensory Disorders	呼吸困难	憋闷/憋气/喘/呼吸急促/胸闷/胸疼/胸痛/压气
Non-motor symptoms	Sleep and Sensory Disorders	生动梦境（忧伤梦境）	no synobyms
Non-motor symptoms	Sleep and Sensory Disorders	白天嗜睡	清晨疲倦/爱困/打瞌睡/犯困/哈欠/昏昏沉沉/昏昏欲睡/瞌睡/嗜睡/睡不醒/思睡/贪睡
Non-motor symptoms	Sleep and Sensory Disorders	入睡困难	入睡/失眠
Non-motor symptoms	Sleep and Sensory Disorders	尿频	起夜/憋不住/尿床/尿裤子/尿多/多尿/尿失禁/尿急/尿频/小便/小解/解手/厕所/卫生间
Non-motor symptoms	Sleep and Sensory Disorders	不宁腿综合征	不安腿/腿动/不宁腿综合征/不宁退/不停走/虫爬/蚂蚁/安放
Non-motor symptoms	Sleep and Sensory Disorders	感觉异常	异常发热/烧灼感/异常感觉/味觉异常
Non-motor symptoms	Sleep and Sensory Disorders	痉挛	痉挛/挛缩/抽搐
Non-motor symptoms	Sleep and Sensory Disorders	麻木	发麻/麻木/木麻/无知觉/手麻/麻痹
Non-motor symptoms	Sleep and Sensory Disorders	疼痛	疼/痛
Non-motor symptoms	Sleep and Sensory Disorders	嗅觉障碍	嗅觉失灵/嗅觉减退/嗅觉
Non-motor symptoms	Sleep and Sensory Disorders	RBD	梦/多梦/噩梦/恶梦/梦多/梦游/梦魇/吓醒/梦呓/做梦/剧烈/暴力/蹬/打伤/滚落/滚下
Non-motor symptoms	Cognitive and Psychiatric Disorders	痴呆	阿尔茨海默/阿尔茨海默病/阿尔兹/痴呆/路易/脑萎缩/认知功能障碍/认知障碍/血管性痴呆/呆傻/老年痴呆/老年痴呆症/老年性痴呆/
Non-motor symptoms	Cognitive and Psychiatric Disorders	淡漠	缄默/贫乏/神情恍惚
Non-motor symptoms	Cognitive and Psychiatric Disorders	幻觉	被害/错觉/胡话/胡言乱语/糊涂/幻视/幻听/幻想/精神错乱/迫害/神经错乱/神志不清/神智不清/说胡话/思维混乱/妄想/妄想症/臆想
Non-motor symptoms	Cognitive and Psychiatric Disorders	焦虑	no synobyms
Non-motor symptoms	Cognitive and Psychiatric Disorders	其他精神问题	被害/分裂症/嫉妒妄想/精分/精神病/精神分裂/精神分裂症/精神异常/恐惧症/偏执型精神分裂症/情绪障碍/认知功能障碍/认知障碍/双相情感障碍/双相障碍/妄想/抑郁症/癔病/癔症/躁狂症/谵妄/烦躁易怒/孤独感
Non-motor symptoms	Cognitive and Psychiatric Disorders	抑郁	更年期抑郁症/抗抑郁药物/情绪低落/抑郁症/抑郁状态/忧郁/忧郁症/包袱/悲观/悲观厌世/低落/敌意/恶劣/懒散/没意思/伤感/思虑/提心吊胆/消沉/消极/心结/厌世/钻牛角尖
Non-motor symptoms	Cognitive and Psychiatric Disorders	反应迟钝	迟钝/发呆/不灵敏/变笨
Non-motor symptoms	Autonomic Disorders	便秘	肠清茶/大便干结/大便秘结/灌肠剂/无便意
Non-motor symptoms	Autonomic Disorders	其他肠胃功能障碍	消化/胃轻瘫痪/恶心/呕吐/胃排空减慢/吞咽困难/吞咽
Non-motor symptoms	Autonomic Disorders	多汗	no synobyms
Non-motor symptoms	Autonomic Disorders	流涎	流口水/口水
Non-motor symptoms	Autonomic Disorders	体位性低血压	no synobyms
Motor complications	Dyskinesia	异动症	剂峰型异动症/双相型异动症
Motor complications	Motor fluctuation	症状波动	不稳定/控制不稳定/波动大/药效减退快/剂末现象/开关现象/开期延迟/关期/剂量延迟/开关/剂末/剂峰/运动波动/疗效减退/疗效降低/效果下降/失效/疗效下降/效果减退/效果降低/关期肌张力障碍

## Sheet: nocturnal symptoms
Nocturnal symptoms classification	Symptom	Lable rule
Nocturnal non-motor symptom	睡眠质量差	睡眠质量差
Nocturnal non-motor symptom	入睡困难	入睡困难
Nocturnal non-motor symptom	睡眠浅	睡眠浅
Nocturnal non-motor symptom	清晨疲倦/昏昏欲睡	白天嗜睡
Nocturnal non-motor symptom	夜尿频多	尿频 AND 夜间
Nocturnal non-motor symptom	不宁腿/手臂	不宁腿综合症 AND 夜间
Nocturnal non-motor symptom	RBD	RBD
Nocturnal motor symptom	晨起疼痛姿态	晨起 AND 疼痛
Nocturnal motor symptom	觉醒时震颤	(抖/颤) AND 夜间
Nocturnal non-motor symptom	痛苦的幻觉	幻觉 AND 夜间
Nocturnal motor symptom	不适和不能移动	(僵直 AND 夜间) & (翻身难)
Nocturnal non-motor symptom	手臂和腿疼痛	疼痛 AND 夜间
Nocturnal non-motor symptom	手臂或腿部肌肉痉挛	痉挛 AND 夜间
Nocturnal non-motor symptom	呼吸困难/打鼾	(呼吸困难&打鼾) AND 夜间
